# Supplementary material for: Risk of subsequent primary neoplasms in survivors of adolescent and young adult cancer (Teenage and Young Adult Cancer Survivor Study): a population-based, cohort study
Source: PubMed Central journal article supplement (PMC6494975; doi:10.1016/s1470-2045(18)30903-3), 2019-04
Supplement: mmc1.pdf [file mmc1.pdf]

# THE LANCET Oncology

## Supplementary appendix

This appendix formed part of the original submission and has been peer reviewed.  
We post it as supplied by the authors.

Supplement to: Bright C J, Reulen R C, Winter D L, et al. Risk of subsequent primary neoplasms in survivors of adolescent and young adult cancer (Teenage and Young Adult Cancer Survivor Study): a population-based, cohort study. *Lancet Oncol* 2019; published online Feb 20. [http://dx.doi.org/10.1016/S1470-2045\(18\)30903-3](http://dx.doi.org/10.1016/S1470-2045(18)30903-3).

**Risk of subsequent primary neoplasms in survivors of adolescent and young adult cancer: The Teenage and Young Adult Cancer Survivor Study – a population-based cohort study**

Corresponding Author: Michael M Hawkins. Email: [m.m.hawkins@bham.ac.uk](mailto:m.m.hawkins@bham.ac.uk)

**Web appendix**

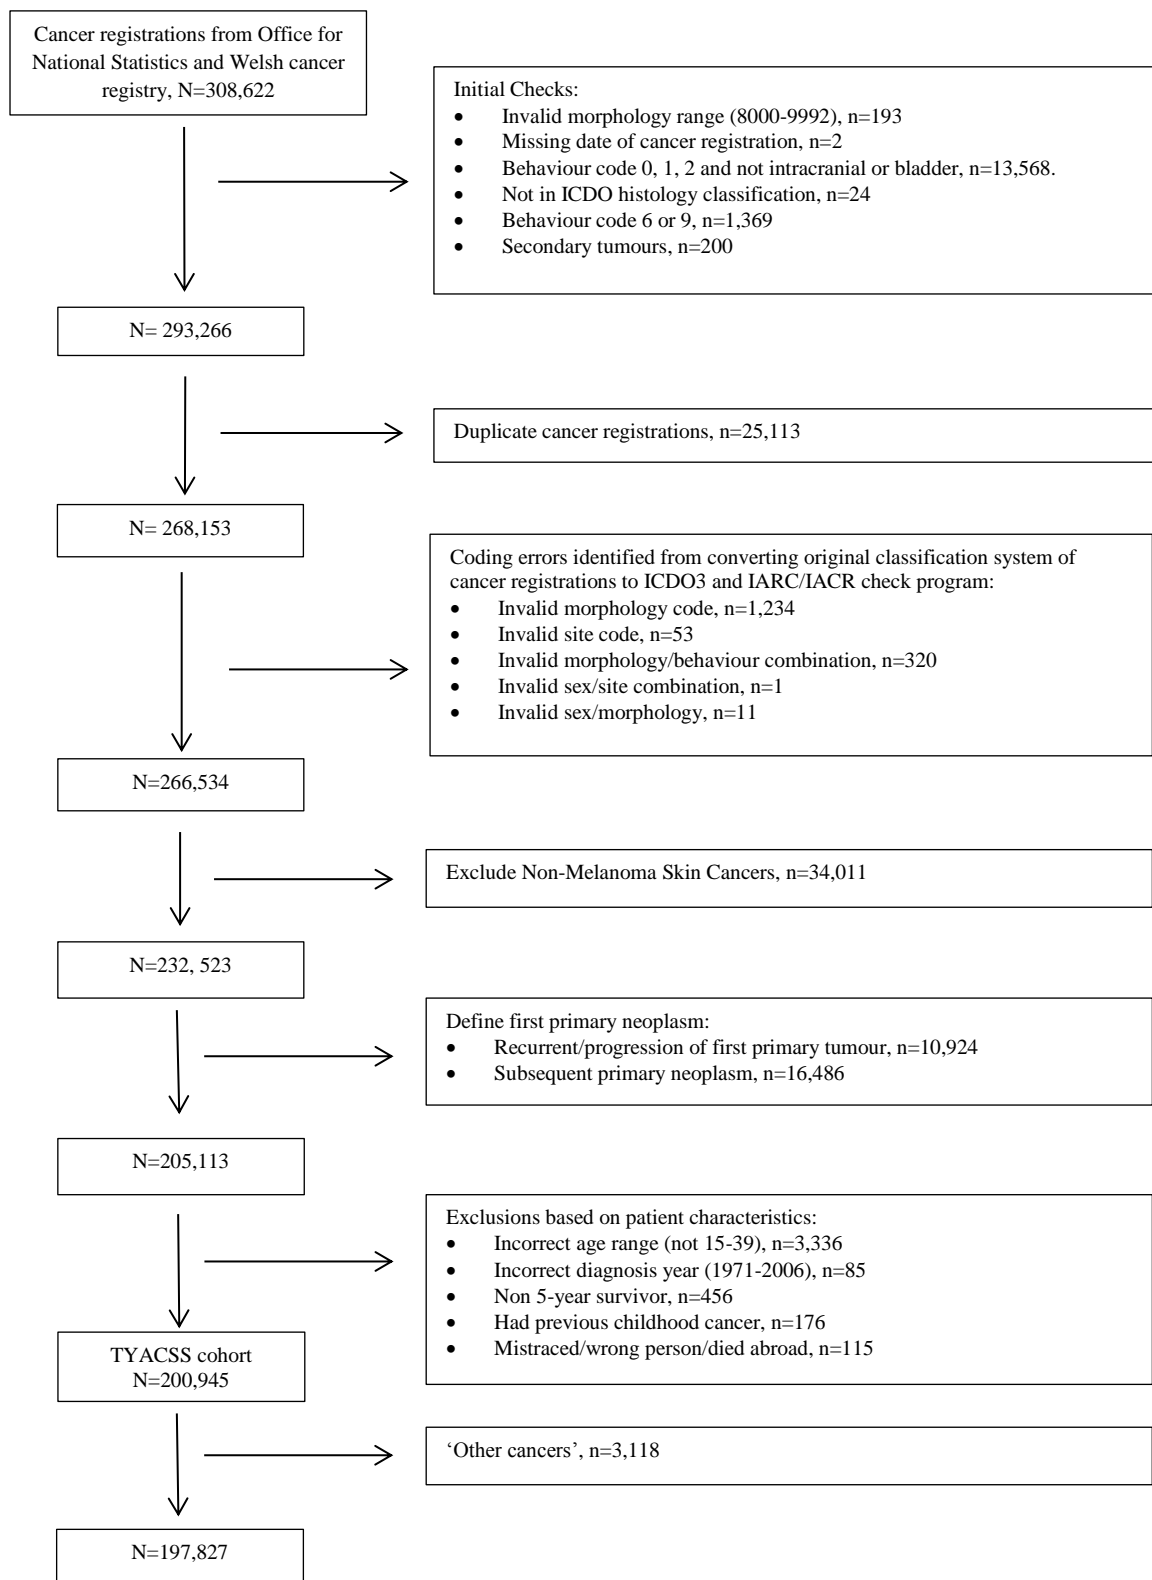

**Appendix Figure 1: Process to create the Teenage and Young Adult Cancer Survivor Study (TYACSS) cohort from cancer registration data.**

**Appendix Table 1: Groupings of AYA cancer based on the adolescent and young adult cancer classification scheme. (Refinements are highlighted in red)**

| <b>Broader Groupings used in current study</b>                           | <b>AYA classification</b>                                                         | <b>AYA code</b> |
|--------------------------------------------------------------------------|-----------------------------------------------------------------------------------|-----------------|
| <b>Leukaemia</b>                                                         | Acute Lymphoid Leukaemia                                                          | 1.1             |
|                                                                          | Acute Myeloid Leukaemia                                                           | 1.2             |
|                                                                          | Chronic Myeloid Leukaemia                                                         | 1.3             |
|                                                                          | Other and Unspecified Leukaemias                                                  | 1.4             |
| <b>Non-Hodgkin Lymphoma</b>                                              | Non- Hodgkin Lymphoma, specified subtype                                          | 2.1.1           |
|                                                                          | Unspecified Non-Hodgkin Lymphoma                                                  | 2.1.2           |
|                                                                          | <b>Myeloma, mast cell tumours and miscellaneous lymphoreticular neoplasms NEC</b> | <b>9.2.3</b>    |
| <b>Hodgkin Lymphoma</b>                                                  | Hodgkin Lymphoma, specified subtype                                               | 2.2.1           |
|                                                                          | Hodgkin lymphoma NOS                                                              | 2.2.2           |
| <b>CNS Intracranial (Including Brain, Meninges and Pituitary Gland)</b>  | Pilocytic Astrocytoma                                                             | 3.1.1           |
|                                                                          | Other specified low grade astrocytic tumours                                      | 3.1.2           |
|                                                                          | Glioblastoma and anaplastic astrocytoma                                           | 3.1.3           |
| <b>Spinal Cord &amp; other CNS</b>                                       | Astrocytoma, NOS                                                                  | 3.1.4           |
|                                                                          | Oligodendroglioma                                                                 | 3.2.1           |
|                                                                          | Other specified glioma                                                            | 3.2.2           |
|                                                                          | Glioma, NOS                                                                       | 3.2.3           |
|                                                                          | Ependymoma                                                                        | 3.3             |
|                                                                          | Medulloblastoma                                                                   | 3.4.1           |
|                                                                          | Supratentorial PNET                                                               | 3.4.2           |
|                                                                          | Craniopharyngioma                                                                 | 3.5.1           |
|                                                                          | Other pituitary tumours                                                           | 3.5.2           |
|                                                                          | Pineal tumours                                                                    | 3.5.3           |
|                                                                          | Choroid plexus tumours                                                            | 3.5.4           |
|                                                                          | Meningioma                                                                        | 3.5.5           |
|                                                                          | Nerve sheath tumours of CNS                                                       | 3.5.6           |
|                                                                          | Other specified intracranial and intraspinal neoplasms                            | 3.5.7           |
|                                                                          | Unspecified malignant intracranial and intraspinal neoplasms                      | 3.6.1           |
| Unspecified benign and borderline intracranial and intraspinal neoplasms | 3.6.2                                                                             |                 |
| <b>Germ cell intracranial</b>                                            | <b>6.2.1</b>                                                                      |                 |
| <b>Bone Neoplasms</b>                                                    | Osteosarcoma                                                                      | 4.1             |
|                                                                          | Chondrosarcoma                                                                    | 4.2             |
|                                                                          | Ewing sarcoma of bone                                                             | 4.3.1           |
|                                                                          | Ewing sarcoma of specified site other than bone                                   | 4.3.2           |
|                                                                          | Ewing sarcoma of unspecified site                                                 | 4.3.3           |
|                                                                          | Other specified bone tumours                                                      | 4.4.1           |
|                                                                          | Unspecified bone tumours                                                          | 4.4.2           |

|                                 |                                                                                   |            |
|---------------------------------|-----------------------------------------------------------------------------------|------------|
| <b>Soft Tissue Sarcoma</b>      | Fibrosarcoma                                                                      | 5.1.1      |
|                                 | Malignant Fibrous Histiocytoma                                                    | 5.1.2      |
|                                 | Dermatofibrosarcoma                                                               | 5.1.3      |
|                                 | Rhabdomyosarcoma                                                                  | 5.2        |
|                                 | Liposarcoma                                                                       | 5.3.1      |
|                                 | Leiomyosarcoma                                                                    | 5.3.2      |
|                                 | Synovial sarcoma                                                                  | 5.3.3      |
|                                 | Clear cell sarcoma                                                                | 5.3.4      |
|                                 | Blood vessel tumours                                                              | 5.3.5      |
|                                 | Nerve sheath tumours                                                              | 5.3.6      |
|                                 | Alveolar soft part sarcoma                                                        | 5.3.7      |
|                                 | Other specified                                                                   | 5.3.8      |
| Unspecified soft tissue sarcoma | 5.4                                                                               |            |
| <hr/>                           |                                                                                   |            |
| <b>Melanoma</b>                 | Melanoma                                                                          | 7.1        |
| <hr/>                           |                                                                                   |            |
| <b>Carcinomas – by site</b>     |                                                                                   | 8          |
| <hr/>                           |                                                                                   |            |
| <b>Thyroid</b>                  | Thyroid Carcinoma                                                                 | 8.1        |
| <hr/>                           |                                                                                   |            |
| <b>Head and Neck</b>            | Nasopharyngeal carcinoma                                                          | 8.2.1      |
|                                 | Other sites in lip, oral cavity and pharynx                                       | 8.2.2      |
|                                 | Nasal cavity, middle ear, sinuses, larynx and other and ill-defined head and neck | 8.2.3      |
| <hr/>                           |                                                                                   |            |
| <b>Lung</b>                     | Trachea, bronchus and lung                                                        | 8.3        |
| <hr/>                           |                                                                                   |            |
| <b>Breast</b>                   | Carcinoma of breast (women only)                                                  | 8.4        |
| <hr/>                           |                                                                                   |            |
| <b>Bladder</b>                  | Carcinoma of bladder                                                              | 8.5.2      |
|                                 | Unspecified malignant neoplasms, NEC (in bladder site)                            | 10         |
|                                 | Unspecified benign and borderline neoplasms, NEC (in bladder site)                | Not in AYA |
|                                 | Benign and borderline neoplasms of bladder (ICDO3 code 8010-8589, 8982)           | Not in AYA |
| <hr/>                           |                                                                                   |            |
| <b>GU Tract (other)</b>         | Carcinoma of kidney                                                               | 8.5.1      |
|                                 | Carcinoma of other and ill-defined sites in GU tract                              | 8.5.5      |
|                                 | Wilms tumour                                                                      | 9.1.1      |
| <hr/>                           |                                                                                   |            |
| <b>Ovary</b>                    | Carcinoma of ovary                                                                | 8.5.3      |
|                                 | Germ cell and trophoblastic neoplasms of gonads (women only)                      | 6.1        |
|                                 | Other specified gonadal tumours (women only)                                      | 9.2.2      |
| <hr/>                           |                                                                                   |            |
| <b>Cervix</b>                   | Carcinoma of cervix                                                               | 8.5.4      |
| <hr/>                           |                                                                                   |            |
| <b>Gastrointestinal Tract</b>   | Carcinoma of colon and rectum                                                     | 8.6.1      |
|                                 | Carcinoma of stomach                                                              | 8.6.2      |

|               |                                                        |       |
|---------------|--------------------------------------------------------|-------|
|               | Carcinoma of liver and intrahepatic bile ducts         | 8.6.3 |
|               | Carcinoma of pancreas                                  | 8.6.4 |
|               | Carcinoma of other and ill-defined sites in GI tract   | 8.6.5 |
| <hr/>         |                                                        |       |
| <b>Testis</b> | Germ cell gonadal (men only)                           | 6.1   |
|               | Other specified gonadal tumours (men only)             | 9.2.2 |
| <hr/>         |                                                        |       |
| <b>Other</b>  | Other non-gonadal sites                                | 6.2.2 |
|               | Non melanoma skin cancer (non-epithelial tumours only) | 7.2   |
|               | Carcinoma of breast (men only)                         | 8.4   |
|               | Adrenocortical carcinoma                               | 8.7.1 |
|               | Carcinoma of other and ill-defined sites, NEC          | 8.7.2 |
|               | Neuroblastoma                                          | 9.1.2 |
|               | Other paediatric and embryonal, NEC                    | 9.1.3 |
|               | Paranglioma and glomus                                 | 9.2.1 |
|               | Other specified neoplasms, NEC                         | 9.2.4 |
|               | Unspecified malignant neoplasms, NEC                   | 10    |

Abbreviations: AYA= adolescents and young adults; NEC=not elsewhere classified; NOS= not otherwise specified; GI= gastrointestinal; GU=genitourinary; CNS= central nervous system; PNET= primitive neuroectodermal tumour.

**Appendix Table 2: Description of ‘Other’ AYA cancers excluded from analysis.**

| <b>Description</b>                             | <b>Number of Subsequent Primary Neoplasms</b> |
|------------------------------------------------|-----------------------------------------------|
| CNS tumour (located outside of the CNS)        | 62                                            |
| Germ cell neoplasm (non-gonadal, extracranial) | 607                                           |
| Non-epithelial Skin Cancer                     | 192                                           |
| Breast neoplasm in men                         | 103                                           |
| Adrenocortical carcinoma                       | 82                                            |
| Carcinoma of other and ill-defined sites, NEC  | 528                                           |
| Neuroblastoma                                  | 59                                            |
| Other paediatric and embryonal neoplasms, NEC  | 63                                            |
| Paraganglioma and glomus neoplasms             | 143                                           |
| Other specified neoplasms, NEC                 | 664                                           |
| Unspecified malignant neoplasm, NEC            | 615                                           |
| Total                                          | 3,118                                         |

Abbreviations:, CNS – central nervous system, NEC – not elsewhere classified

**Appendix Table 3: Exclusions of AYA cancer and subsequent primary neoplasms combinations**

| Subsequent Primary Neoplasms | First Primary Neoplasm |          |          |          |                  |          |          |          |            |          |          |           |
|------------------------------|------------------------|----------|----------|----------|------------------|----------|----------|----------|------------|----------|----------|-----------|
|                              | Breast (women)         | Testis   | Cervix   | Melanoma | Hodgkin lymphoma | NHL      | Thyroid  | Brain    | Colorectal | STS      | Ovary    | Leukaemia |
| Breast (women)               | Excluded               | N/A      |          |          |                  |          |          |          |            |          |          |           |
| Corpus Uteri                 |                        |          | Excluded |          |                  |          |          |          |            |          | Excluded |           |
| Ovary                        |                        | N/A      | Excluded |          |                  |          |          |          |            |          | Excluded |           |
| Other Genital (women)        |                        | N/A      | Excluded |          |                  |          |          |          |            |          | Excluded |           |
| Kidney                       |                        |          |          |          |                  |          |          |          |            |          |          |           |
| Bladder                      |                        |          |          |          |                  |          |          |          |            |          |          |           |
| Other Urinary                |                        |          |          |          |                  |          |          |          |            |          |          |           |
| Prostate                     | N/A                    |          | N/A      |          |                  |          |          |          |            |          | N/A      |           |
| Other Genital (men)          | N/A                    | Excluded | N/A      |          |                  |          |          |          |            |          | N/A      |           |
| Colorectal                   |                        |          |          |          |                  |          |          |          | Excluded   |          |          |           |
| Oesophagus                   |                        |          |          |          |                  |          |          |          |            |          |          |           |
| Stomach                      |                        |          |          |          |                  |          |          |          |            |          |          |           |
| Pancreas                     |                        |          |          |          |                  |          |          |          |            |          |          |           |
| Other Digestive <sup>1</sup> |                        |          |          |          |                  |          |          |          |            |          |          |           |
| Lung & Bronchus              |                        |          |          |          |                  |          |          |          |            |          |          |           |
| Other Respiratory            |                        |          |          |          |                  |          |          |          |            |          |          |           |
| Melanoma                     |                        |          |          | Excluded |                  |          |          |          |            |          |          |           |
| Brain                        |                        |          |          |          |                  |          |          | Excluded |            |          |          |           |
| Meninges                     |                        |          |          |          |                  |          |          |          |            |          |          |           |
| Spinal Cord & other CNS      |                        |          |          |          |                  |          |          |          |            |          |          |           |
| Pituitary Gland              |                        |          |          |          |                  |          |          |          |            |          |          |           |
| Thyroid                      |                        |          |          |          |                  |          | Excluded |          |            |          |          |           |
| STS                          |                        |          |          |          |                  |          |          |          |            | Excluded |          |           |
| Bone Sarcoma                 |                        |          |          |          |                  |          |          |          |            | Excluded |          |           |
| NHL                          |                        |          |          |          | Excluded         | Excluded |          |          |            |          |          | Excluded  |
| Leukaemia                    |                        |          |          |          | Excluded         | Excluded |          |          |            |          |          | Excluded  |
| Oral                         |                        |          |          |          |                  |          |          |          |            |          |          |           |
| Other                        |                        |          |          |          |                  |          |          |          |            |          |          |           |
| --Hodgkin lymphoma           |                        |          |          |          | Excluded         | Excluded |          |          |            |          |          | Excluded  |
| --Other lymphoid             |                        |          |          |          | Excluded         | Excluded |          |          |            |          |          | Excluded  |
| --Eye                        |                        |          |          | Excluded |                  |          |          |          |            |          |          |           |
| --Breast (Men only)          | N/A                    |          |          |          |                  |          |          |          |            |          |          |           |
| --Other Endocrine            |                        |          |          |          |                  |          |          |          |            |          |          |           |



**Appendix Table 3 continued**

| Subsequent Primary Neoplasms | First Primary Neoplasms |                 |                       |          |                       |                           |                 |          |                 |             |                     |
|------------------------------|-------------------------|-----------------|-----------------------|----------|-----------------------|---------------------------|-----------------|----------|-----------------|-------------|---------------------|
|                              | Bladder                 | Pituitary gland | Head & Neck           | Lung     | Other Genital (women) | Spinal Cord and Other CNS | Other Digestive | Meninges | Urinary (other) | Bone Tumour | Other Genital (men) |
| Breast (women)               |                         |                 |                       |          |                       |                           |                 |          |                 |             | N/A                 |
| Corpus Uteri                 |                         |                 |                       |          | Excluded              |                           |                 |          |                 |             | N/A                 |
| Ovary                        |                         |                 |                       |          | Excluded              |                           |                 |          |                 |             | N/A                 |
| Other Genital (women)        |                         |                 |                       |          | Excluded              |                           |                 |          |                 |             | N/A                 |
| Kidney                       | Excluded                |                 |                       |          |                       |                           |                 |          | Excluded        |             |                     |
| Bladder                      | Excluded                |                 |                       |          |                       |                           |                 |          | Excluded        |             |                     |
| Other Urinary                | Excluded                |                 |                       |          |                       |                           |                 |          | Excluded        |             |                     |
| Prostate                     |                         |                 |                       |          | N/A                   |                           |                 |          |                 |             | Excluded            |
| Other Genital (men)          |                         |                 |                       |          | N/A                   |                           |                 |          |                 |             | Excluded            |
| Colorectal                   |                         |                 |                       |          |                       |                           |                 |          |                 |             |                     |
| Oesophagus                   |                         |                 |                       |          |                       |                           | Excluded        |          |                 |             |                     |
| Stomach                      |                         |                 |                       |          |                       |                           | Excluded        |          |                 |             |                     |
| Pancreas                     |                         |                 |                       |          |                       |                           | Excluded        |          |                 |             |                     |
| Other Digestive              |                         |                 |                       |          |                       |                           | Excluded        |          |                 |             |                     |
| Lung & Bronchus              |                         |                 |                       | Excluded |                       |                           |                 |          |                 |             |                     |
| Other Respiratory            |                         |                 | Excluded <sup>2</sup> | Excluded |                       |                           |                 |          |                 |             |                     |
| Melanoma                     |                         |                 |                       |          |                       |                           |                 |          |                 |             |                     |
| Brain                        |                         |                 |                       |          |                       |                           |                 |          |                 |             |                     |
| Meninges                     |                         |                 |                       |          |                       |                           |                 | Excluded |                 |             |                     |
| Spinal Cord & other CNS      |                         |                 |                       |          |                       | Excluded                  |                 |          |                 |             |                     |
| Pituitary Gland              |                         | Excluded        |                       |          |                       |                           |                 |          |                 |             |                     |
| Thyroid                      |                         |                 |                       |          |                       |                           |                 |          |                 |             |                     |
| STS                          |                         |                 |                       |          |                       |                           |                 |          |                 | Excluded    |                     |
| Bone Sarcoma                 |                         |                 |                       |          |                       |                           |                 |          |                 | Excluded    |                     |
| NHL                          |                         |                 |                       |          |                       |                           |                 |          |                 |             |                     |
| Leukaemia                    |                         |                 |                       |          |                       |                           |                 |          |                 |             |                     |
| Oral                         |                         |                 | Excluded              |          |                       |                           |                 |          |                 |             |                     |
| Other                        |                         |                 |                       |          |                       |                           |                 |          |                 |             |                     |
| --Hodgkin lymphoma           |                         |                 |                       |          |                       |                           |                 |          |                 |             |                     |
| --Other lymphoid             |                         |                 |                       |          |                       |                           |                 |          |                 |             |                     |
| --Eye                        |                         |                 |                       |          |                       |                           |                 |          |                 |             |                     |
| --Breast (Men only)          |                         |                 |                       |          | N/A                   |                           |                 |          |                 |             |                     |
| --Other Endocrine            |                         |                 |                       |          |                       |                           |                 |          |                 |             |                     |

Abbreviations: NHL – non Hodgkin lymphoma, STS – soft tissue sarcoma, CNS – central nervous system.

<sup>1</sup> All liver subsequent primary neoplasms were excluded because of substantial likelihood of metastatic spread.

<sup>2</sup> Nasal cavity, middle ear, accessory sinuses and larynx excluded only. Trachea, lung and bronchus not excluded

**Appendix Table 4: Absolute Excess Risks (AERs) and Relative Excess Risks (RERs) of subsequent primary breast neoplasms among female survivors of Hodgkin lymphoma by age at diagnosis of Hodgkin lymphoma**

|                         | Obs/Ex    | AER (95% CI)     | RER (95% CI) <sup>1</sup> |
|-------------------------|-----------|------------------|---------------------------|
| <b>Overall</b>          | 431/136.3 | 26.7 (23.0,30.4) |                           |
| <b>Age at Diagnosis</b> |           |                  |                           |
| 15-19                   | 132/12.2  | 54.4 (44.2,64.7) | 1.0 (1.0,1.0)             |
| 20-24                   | 115/26.2  | 29.4 (22.4,36.3) | 0.5 (0.4,0.7)             |
| 25-29                   | 76/31.2   | 18.1 (11.2,25.0) | 0.4 (0.2,0.6)             |
| 30-34                   | 63/34.0   | 15.2 (7.1,23.4)  | 0.3 (0.2,0.6)             |
| 35-39                   | 45/32.6   | 8.7 (-0.5,17.9)  | 0.2 (0.1,0.5)             |
| <i>p-trend</i>          |           | <0.0001          | <0.0001                   |

Abbreviations: Obs- observed number of subsequent primary neoplasms, Ex- expected number of subsequent primary neoplasms, AER-absolute excess risk, RER – relative excess risk, CI- confidence interval

<sup>1</sup>From an externally controlled Poisson regression model which contained the following factors: attained age, decade of diagnosis and age at diagnosis.

**Appendix Table 5: Absolute Excess Risks (AERs) and Relative Excess Risks (RERs) of subsequent primary lung neoplasms among male survivors of Hodgkin lymphoma by decade of diagnosis of Hodgkin lymphoma**

|                            | Obs/Ex   | AER (95% CI)     | RER (95% CI) <sup>1</sup> |
|----------------------------|----------|------------------|---------------------------|
| <b>Overall</b>             | 198/41.3 | 10.9 (9.0,12.8)  |                           |
| <b>Decade of Diagnosis</b> |          |                  |                           |
| 1971-1979                  | 110/23.4 | 18.9 (14.4,23.3) | 1.0 (1.0,1.0)             |
| 1980-1989                  | 78/14.1  | 11.9 (8.7,15.1)  | 0.9 (0.6,1.3)             |
| 1990-2006                  | 10/3.9   | 1.4 (-0.0,2.8)   | 0.2 (0.1,0.5)             |
| <i>p-trend</i>             |          | <0.0001          | 0.0001                    |

Abbreviations: Obs- observed number of subsequent primary neoplasms, Ex- expected number of subsequent primary neoplasms, AER-absolute excess risk, RER – relative excess risk, CI- confidence interval

<sup>1</sup>From an externally controlled Poisson regression model which contained the following factors: attained age, decade of diagnosis and age at diagnosis.

**Appendix Table 6: Comparison of SIRs and AERs in Table 1 with SIRs and AERs calculated allowing leukaemia as an subsequent primary neoplasm after AYA Hodgkin lymphoma, non-Hodgkin lymphoma and leukaemia; and allowing any sarcoma as a subsequent primary neoplasm after AYA soft tissue sarcoma and bone tumours**

| First Primary Neoplasm | Results from Table 1 or sensitivity analysis | Number of SPN | Females   |               |                  | Males     |               |                  |
|------------------------|----------------------------------------------|---------------|-----------|---------------|------------------|-----------|---------------|------------------|
|                        |                                              |               | Obs/Ex    | SIR (95% CI)  | AER (95% CI)     | Obs/Ex    | SIR (95% CI)  | AER (95% CI)     |
| Hodgkin Lymphoma       | Table 1                                      | 1606          | 903/288.2 | 3.1 (2.9,3.3) | 55.7 (50.4,61.1) | 703/271.9 | 2.6 (2.4,2.8) | 29.9 (26.3,33.6) |
|                        | Sensitivity                                  | 1665          | 928/293.0 | 3.2 (3.0,3.4) | 57.6 (52.1,63.0) | 737/281.7 | 2.6 (2.4,2.8) | 31.6 (27.9,35.3) |
| Non-Hodgkin Lymphoma   | Table 1                                      | 511           | 216/149.5 | 1.4 (1.3,1.7) | 14.8 (8.4,21.2)  | 295/163.4 | 1.8 (1.6,2.0) | 18.6 (13.8,23.4) |
|                        | Sensitivity                                  | 529           | 221/151.9 | 1.5 (1.3,1.7) | 15.3 (8.9,21.8)  | 308/168.9 | 1.8 (1.6,2.0) | 19.7 (14.8,24.5) |
| Leukaemia              | Table 1                                      | 234           | 120/63.3  | 1.9 (1.6,2.3) | 22.9 (14.2,31.5) | 114/44.4  | 2.6 (2.1,3.1) | 22.7 (15.9,29.5) |
|                        | Sensitivity                                  | 237           | 121/64.3  | 1.9 (1.6,2.2) | 22.9 (14.2,31.6) | 116/46.1  | 2.5 (2.1,3.0) | 22.8 (15.9,29.7) |
| Soft Tissue Sarcoma    | Table 1                                      | 400           | 255/165.7 | 1.5 (1.4,1.7) | 19.8 (12.9,26.8) | 145/106.5 | 1.4 (1.1,1.6) | 9.3 (3.6,15.0)   |
|                        | Sensitivity                                  | 428           | 269/166.8 | 1.6 (1.4,1.8) | 22.7 (15.6,29.9) | 159/107.8 | 1.5 (1.3,1.7) | 12.4 (6.4,18.4)  |
| Bone Tumour            | Table 1                                      | 100           | 52/32.7   | 1.6 (1.2,2.1) | 14.7 (3.9,25.5)  | 48/33.1   | 1.4 (1.1,1.9) | 8.1 (0.7,15.6)   |
|                        | Sensitivity                                  | 113           | 55/33.0   | 1.7 (1.3,2.2) | 16.8 (5.7,27.9)  | 58/33.6   | 1.7 (1.3,2.2) | 13.4 (5.2,21.5)  |

Abbreviations: Obs- observed number of subsequent primary neoplasms, Ex- expected number of subsequent primary neoplasms, SIR- standardised incidence ratio, AER- absolute excess risk, CI- confidence interval
